# Supplementary material for: A 39-Amino-Acid C-Terminal Truncation of GDV1 Disrupts Sexual Commitment in Plasmodium falciparum
Source: PubMed Central journal article supplement (PMC8265674; doi:10.1128/msphere.01093-20), 2021-05-19
Supplement: msphere.01093-20-sf004.pdf [file msphere.01093-20-sf004.pdf]

**A** NF54/GDV1.GFP\_cOE Control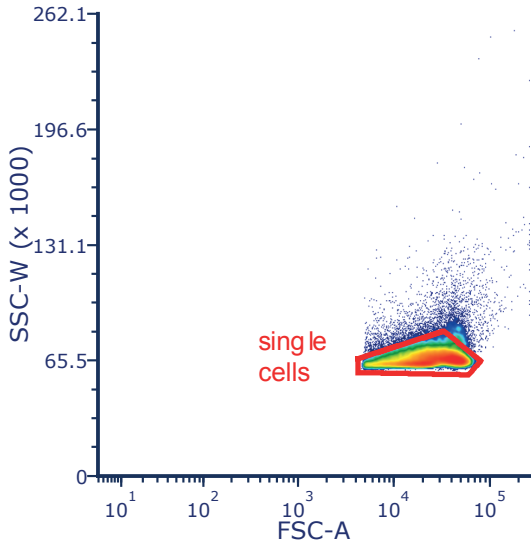

NF54/GDV1.GFP\_cOE Control

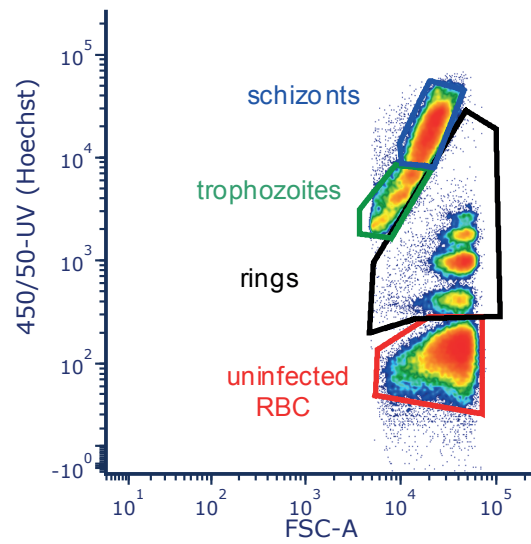**B**

NF54/GDV1.GFP\_cOE Control

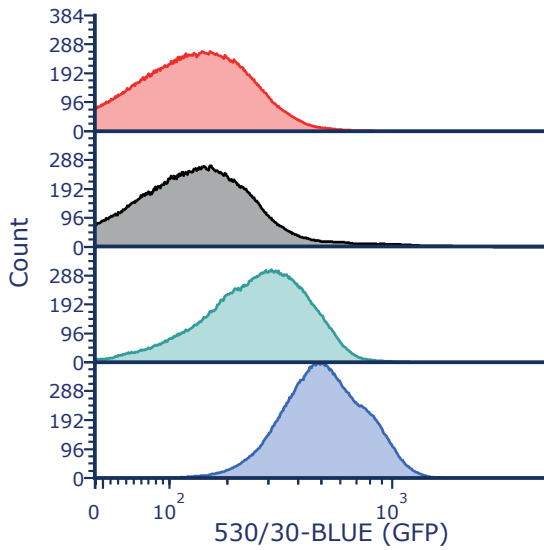

NF54/GDV1.GFP\_cOE Induced

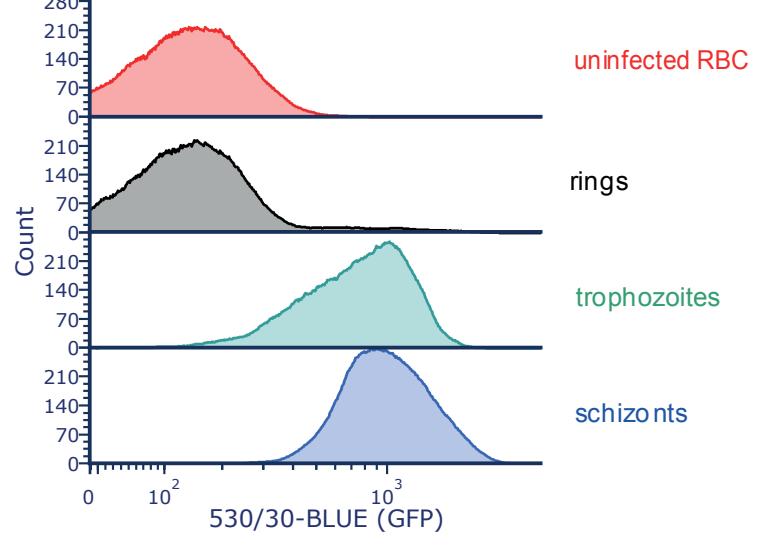**C**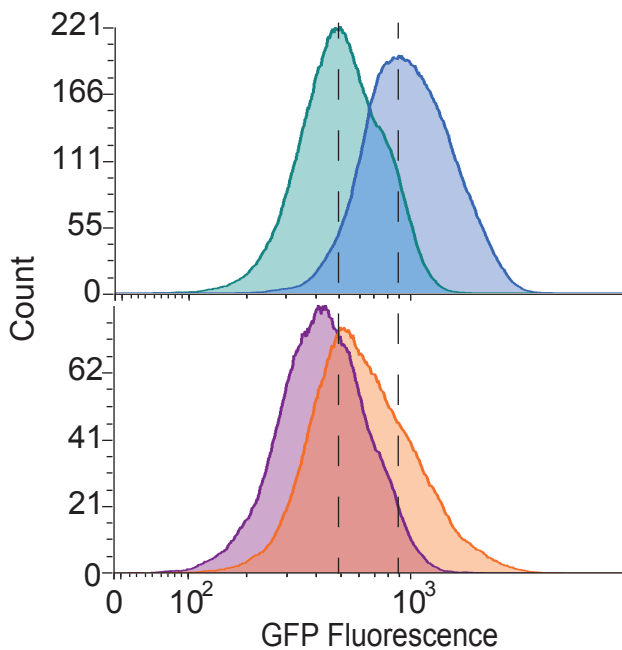**D**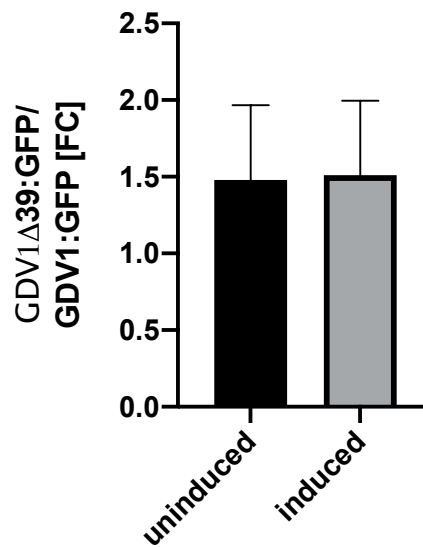**E**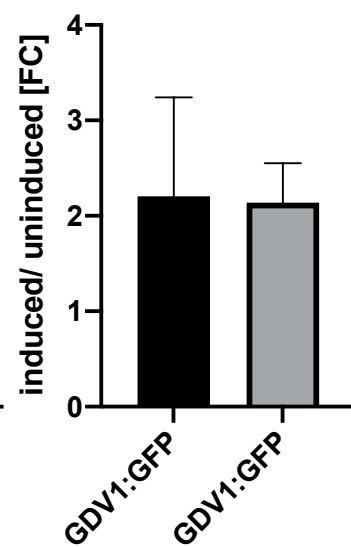

■ GDV1:GFP\_cOE Ctrl     ■ GDV1 $\Delta$ 39:GFP\_cOE Ctrl  
■ GDV1:GFP\_cOE induced     ■ GDV1 $\Delta$ 39:GFP\_cOE induced
